# Supplementary material
Source: publisher site journal article supplement (https://www.dovepress.com/get_supplementary_file.php?f=327152.xlsx)
Supplement: Supplementary file 1 [file get_supplementary_file.php]

## Sheet: Table S1
Table S1. The differential expression results of m6A regulators between AAA and control tissues based on GSE47472 dataset.
ID	Gene symbol	adj.P.Value	P.Value	t	B	logFC	Gene title
ILMN_1695588	HNRNPC	8.41e-08	6.04e-11	-10.2009	14.9918	-1.47604	heterogeneous nuclear ribonucleoprotein C (C1/C2)
ILMN_1673024	RBM15B	0.000102	1.21e-06	6.15202	5.44612	1.58297	RNA binding motif protein 15B
ILMN_2124523	METTL14	0.000166	2.4e-06	-5.89585	4.77587	-0.736808	methyltransferase like 14
ILMN_1666111	YTHDC1	0.0473	0.00463	3.07694	-2.49036	0.47034	YTH domain containing 1
ILMN_2288070	FTO	0.287	0.0522	2.02775	-4.68077	0.437805	fat mass and obesity associated
ILMN_1670878	YTHDC1	0.388	0.0806	1.81289	-5.05106	0.317182	YTH domain containing 1
ILMN_1666739	RBM15	0.543	0.165	1.42469	-5.63458	0.229068	RNA binding motif protein 15
ILMN_1725760	YTHDC2	0.555	0.233	-1.21776	-5.89624	-0.279313	YTH domain containing 2
ILMN_1657283	ALKBH5	0.556	0.267	-1.13336	-5.99241	-0.283824	alkB homolog 5, RNA demethylase
ILMN_2369682	HNRNPA2B1	0.557	0.274	-1.11533	-6.01214	-0.269321	heterogeneous nuclear ribonucleoprotein A2/B1
ILMN_2124951	RBMX	0.56	0.308	-1.03745	-6.09403	-0.257609	RNA binding motif protein, X-linked
ILMN_1702447	IGF2BP2	0.567	0.334	-0.982066	-6.14893	-0.196618	insulin like growth factor 2 mRNA binding protein 2
ILMN_1707506	YTHDC1	0.568	0.336	-0.978876	-6.15201	-0.252223	YTH domain containing 1
ILMN_1733807	IGF2BP1	0.581	0.375	-0.900803	-6.22438	-0.206407	insulin like growth factor 2 mRNA binding protein 1
ILMN_1807423	IGF2BP3	0.594	0.407	-0.841562	-6.27551	-0.171064	insulin like growth factor 2 mRNA binding protein 3
ILMN_1730658	YTHDF2	0.594	0.408	-0.840422	-6.27646	-0.179202	YTH N6-methyladenosine RNA binding protein 2
ILMN_1655635	METTL3	0.596	0.412	-0.833138	-6.28252	-0.195112	methyltransferase like 3
ILMN_1753885	YTHDF1	0.614	0.445	-0.774135	-6.32968	-0.123198	YTH N6-methyladenosine RNA binding protein 1
ILMN_2334587	HNRNPC	0.683	0.553	-0.600659	-6.449	-0.178168	heterogeneous nuclear ribonucleoprotein C (C1/C2)
ILMN_1886493	HNRNPA2B1	0.693	0.568	-0.577658	-6.46262	-0.114723	heterogeneous nuclear ribonucleoprotein A2/B1
ILMN_1657470	YTHDF3	0.847	0.782	-0.278824	-6.59193	-0.0585513	YTH N6-methyladenosine RNA binding protein 3

## Sheet: Table S2
Table S2. The target genes of METTL14, HNRNPC and RBM15B predicted through m6A2Target database.
m6A regulator	Target genes	Number of target genes
METTL14	ABCC11/ ACAD9/ ACADVL/ ACOT2/ ADAM18/ ADAMTS19/ AGBL1/ AHR/ AKT1S1/ APOA4/ APOBEC3F/ ARHGAP17/ BACH2/ BCOR/ BTC/ BTNL8/ C1R/ C2orf76/ CAPN12/ CARTPT/ CASKIN1/ CBFB/ CCDC117/ CCDC40/ CCNL1/ CHD6/ CIDEA/ CINP/ CLCN6/ CLDN8/ CORO6/ CPT1C/ CPVL/ CRELD1/ CRYZL1/ CTAGE1/ CYP19A1/ CYP4Z2P/ DCST2/ DDX19A/ DGKB/ DLD/ DLX2/ DMD/ DMP1/ DNM1L/ DOHH/ DOK3/ DPP8/ DPT/ DSPP/ ECHDC1/ EIF4G1/ F9/ FAM153A/ FAM89A/…	536
HNRNPC	RNA18S5/ XIST/ HEATR9/ PDE3A/ RNA28S5/ RNA58-S5/ TMEM240/ SNORD45A/ DDX17/ NSUN5P2/ SNORD65/ MIR3651/ MALAT1/ DYNLL2/ MBD3/ SNHG3/ TUG1/ ITGB1BP2/ HNRNPA1/ SNORD117/ MIR545/ GOLGA3/ PPIL4/ THOC2/ MIR3620/ SNORA61/ KDELR3/ CLCN1/ PIN4P1/ HIST2H3A/ CCNL2/ MCM5/ YWHAE/ SKI/ GLG1/ UBA2/ FRA10AC1/ MIR6862-2/ MRPL24/ HNRNPA2B1/ TIMM44/ RPS15A/ SNORA14B/ BRD4/ MORF4L2/ RAB33B/ ZNF192P1/ PABPN1/ PLEKHG5/…	701
RBM15B	RN7SK/ TRIM7/ XIST/ HIST1H4H/ RNA5-8S5/ CCDC115/ ZNF184/ VN1R10P/ PSMB3/ MGST2/ RNU11/ DDX3X/ OR4D9/ RNA28S5/ LOC643770/ MIR5188/ RNY1/ RNVU1-6/ LINC01570/ PSMA3/ ALOXE3/ RNU6-8/ MIR5096/ GREB1/ KCTD19/ MIR6501/ POLG/ MALAT1/ RNASE12/ LENG9/ CLK2/ ZNF503-AS2/ OR6S1/ RNF112/ RNU5E-1/ SLIT2/ GNGT2/ RNU5D-1/ VTRNA1-2/ NUFIP1/ RNU5F-1/ LOC102724064/ LINC00533/ SNORD28/ CLINT1/ WBP4/ DDX17/ HOXA5/ RNU…	3106

## Sheet: Table S3
Table S3. The genes possibly regulated by METTL14, HNRNPC and RBM15B in AAA disease.
m6A regulator	Target genes	Number of target genes
METTL14	ABCC11/ ACAD9/ ACADVL/ ACOT2/ ADAM18/ ADAMTS19/ AGBL1/ AHR/ AKT1S1/ APOA4/ APOBEC3F/ ARHGAP17/ BACH2/ BCOR/ BTC/ BTNL8/ C1R/ C2orf76/ CAPN12/ CARTPT/ CASKIN1/ CBFB/ CCDC117/ CCDC40/ CCNL1/ CHD6/ CIDEA/ CINP/ CLCN6/ CLDN8/ CORO6/ CPT1C/ CPVL/ CRELD1/ CRYZL1/ CTAGE1/ CYP19A1/ CYP4Z2P/ DCST2/ DDX19A/ DGKB/ DLD/ DLX2/ DMD/ DMP1/ DNM1L/ DOHH/ DOK3/ DPP8/ DPT/ DSPP/ ECHDC1/ EIF4G1/ F9/ FAM153A/ FAM89A/…	219
HNRNPC	CTNNB1/ BASP1/ RASL11A/ RAC1/ SHH/ MSH4/ TEX10/ ZNF24/ ZNF251/ ATAD1/ SETD5/ FKBP3/ PTBP1/ FANCI/ AK2/ RIT1/ RPS24/ SPPL3/ MLEC/ ABL2/ RHEB/ AKIRIN1/ YJEFN3/ CAV2/ PBRM1/ SNX29/ MATR3/ ING5/ TAC4/ C2orf42/ VCL/ CCDC59/ AARS/ LRPPRC/ PUS1/ MCM7/ CCDC62/ S100PBP/ SSU72/ CSE1L/ MORF4L2/ USP22/ FAF1/ FCGR2A/ S100A13/ ACACA/ TMEM101/ PGAM2/ ZNF282/ MED15/ OCLM/ C1QBP/ ILF3/ NUP85/ WAC/ RGPD5/ EXOSC6/ …	383
RBM15B	EEF1A1/ IPO13/ CDT1/ TRPV1/ HNRNPAB/ SNIP1/ BRD9/ DERL3/ HIST1H2BD/ NUMBL/ XRCC2/ C6orf201/ RTN3/ TMEM191B/ GALNT11/ FGFR3/ MRPL43/ DHX9/ DVL2/ TTC8/ IPO7/ BRAF/ ACTR5/ SHH/ RFXAP/ EZH2/ ECH1/ SH3D19/ MSH4/ SNCG/ HAUS6/ MID1/ GLUL/ NAMPT/ COX6C/ HAPLN3/ UBE3A/ ZNF24/ SEMA6D/ DNMT3A/ EPHA6/ SCARF2/ INTS6/ MRPS21/ METTL10/ COPS2/ ATP2A2/ STAB1/ CDK5RAP2/ USP9X/ SNORD28/ ZNF251/ C16orf59/ CHMP2A/ CO…	1182

## Sheet: Table S4
Table S4. The target genes of METTL14, HNRNPC and RBM15B associated with metabolism and autophagy.
m6A regulator	Target genes	Number of target genes
METTL14	ACADVL/ ACOT2/ CPT1C/ CYP19A1/ DGKB/ DLD/ ECHDC1/ HK1/ IPMK/ LBR/ NANP/ NAT1/ NDUFB6/ NDUFS3/ PCBD1/ PDE11A/ PDE2A/ PIK3C2A/ PIP4K2C/ PLCG1/ PNPLA4/ DNM1L/ EIF4G1/ MCL1/ PIK3C2A/ PIP4K2C/ SNX14/ TRIM34	28
HNRNPC	AK2/ ACACA/ PGAM2/ CKB/ ALDH1B1/ PNPO/ PSAT1/ PHGDH/ ENOPH1/ NDUFB1/ LALBA/ GAL3ST1/ HPRT1/ NDUFA12/ AOC2/ SDHC/ POLR1C/ PRPS2/ MAN2B1/ NFS1/ GPD1/ MCCC2/ PIP5K1A/ ATP5J/ ST6GALNAC1/ DLST/ ADSS/ FDPS/ PDE3A/ MRI1/ OGT/ LBR/ NDUFAB1/RAC1/ ABL2/ RHEB/ WAC/ SNX5/ GFAP/ PYCARD/ RAB33B/ CDK5R1/ PSEN1/ PGAM5/ UFM1/ DYNLL2/ ATF4/ PRKD1/ TMEM39B/ CTSB/ MARK2	51
RBM15B	GALNT11/ EZH2/ GLUL/ NAMPT/ COX6C/ DNMT3A/ MDH1/ GALT/ AHCY/ NME2/ IL4I1/ SRM/ CANT1/ MINPP1/ GCNT1/ PGAM2/ POLR2L/ PDXK/ PPAT/ ADCY3/ AASS/ SLC37A4/ POLR1E/ MARS2/ POLR3A/ SEPHS2/ PIGS/ GGPS1/ OGT/ ENPP1/ PTEN/ WBSCR17/ SLC33A1/ TPI1/ ST3GAL2/ RDH10/ PYCR1/ ACSF3/ SETDB1/ ITPA/ UQCRC2/ PTGES3/ ATP6V0B/ ATP5F1/ ALG2/ ICMT/ LDHB/ ALOX15/ CHPF/ DPM2/ POLR2C/ PDXP/ CDIPT/ MAT2A/ HS6ST2/ GPX6/ UGT2B1…	169
